# Supplementary material
Source: PubMed Central journal article supplement (PMC6894063)

**Supplemental Table S1.** Primers used in real-time PCR analysis

| Gene                                  | Forward primer (5' to 3') | Reverse primer (5' to 3') |
|---------------------------------------|---------------------------|---------------------------|
| <i>Human FAM19A1</i>                  | CCTGGGTCCTGTATTTGTGGA     | GCTGCTATCACTTCACACGTC     |
| <i>Human FAM19A2</i>                  | TGTTAAAACGGGAACCTTGTGAGG  | AAGCATCCACACATGATGGAG     |
| <i>Human FAM19A3</i>                  | TGGTGGTGTTCAGATGGAGC      | GAGCACCTTACACTCCTCCC      |
| <i>Human FAM19A4</i>                  | AGCCTACGTGTTAATGGTGTG     | GTCCCTTGCTTGATTTGGTGG     |
| <i>Human FAM19A5</i>                  | CCCGCTGTGCGTGTAGAAA       | GGTCTTGATGATTCTTGCGTCC    |
| <i>Human GAPDH</i>                    | GTCTCCTCTGACTTCAACAGCG    | ACCACCCTGTTGCTGTAGCAA     |
| <i>Mouse Fam19a1</i>                  | GTGTTCCCTGTTTACCTGGGAAA   | GCTCCATCTCACACCACCATT     |
| <i>Mouse/rat Fam19a2</i>              | TAGTGACCTTGTGGGGGAAAG     | TTTGGGACCGTTCTTCTATCTTG   |
| <i>Mouse/rat Fam19a3</i>              | CAACATCCGCAGTCCTAGTGA     | GAGCACCTTACACTCCTCTCC     |
| <i>Mouse Fam19a4</i>                  | CCTATGTGTTAATGGTCTGCTGT   | CCACCACTTCTCAATCACAATGG   |
| <i>Mouse/rat Fam19a5</i>              | GGTGATTCACGCGCAGTTC       | GGTCACAATCTCACAGGTTCC     |
| <i>Mouse Gapdh</i>                    | CATCACTGCCACCCAGAAGACTG   | ATGCCAGTGAGCTTCCCGTTCAG   |
| <i>Mouse <math>\beta</math>-actin</i> | AGTGTGACGTTGACATCCGTA     | GCCAGAGCAGTAATCTCCTTCT    |
| <i>Rat Fam19a1</i>                    | CTTGCAAGGAATTTACCCATCC    | GGGCCGTCCGGTCAATG         |
| <i>Rat Fam19a4</i>                    | GTACTAAGAGGGCGATGGGC      | GGGCTTGGAAGACCTGTAGT      |
| <i>Rat <math>\beta</math>-actin</i>   | CGCGAGTACAACCTTCTTGC      | CGTCATCCATGGCGAACTGG      |

**Supplemental Figure S1.** Temporal expression of human *FAM19A1-5* from embryonic, early fetal, late fetal, neonatal, early childhood, adolescence, to adulthood. These data were derived from the Human Brain Transcriptome database (Kang et al. Spatio-temporal transcriptome of the human brain. *Nature* 2011; 478, 483-489). NCX, Neocortex; HIP, Hippocampal anlage; AMY, amygdala; STR, striatum; MD, Mediodorsal nucleus of the thalamus; CBC, Cerebellar cortex.

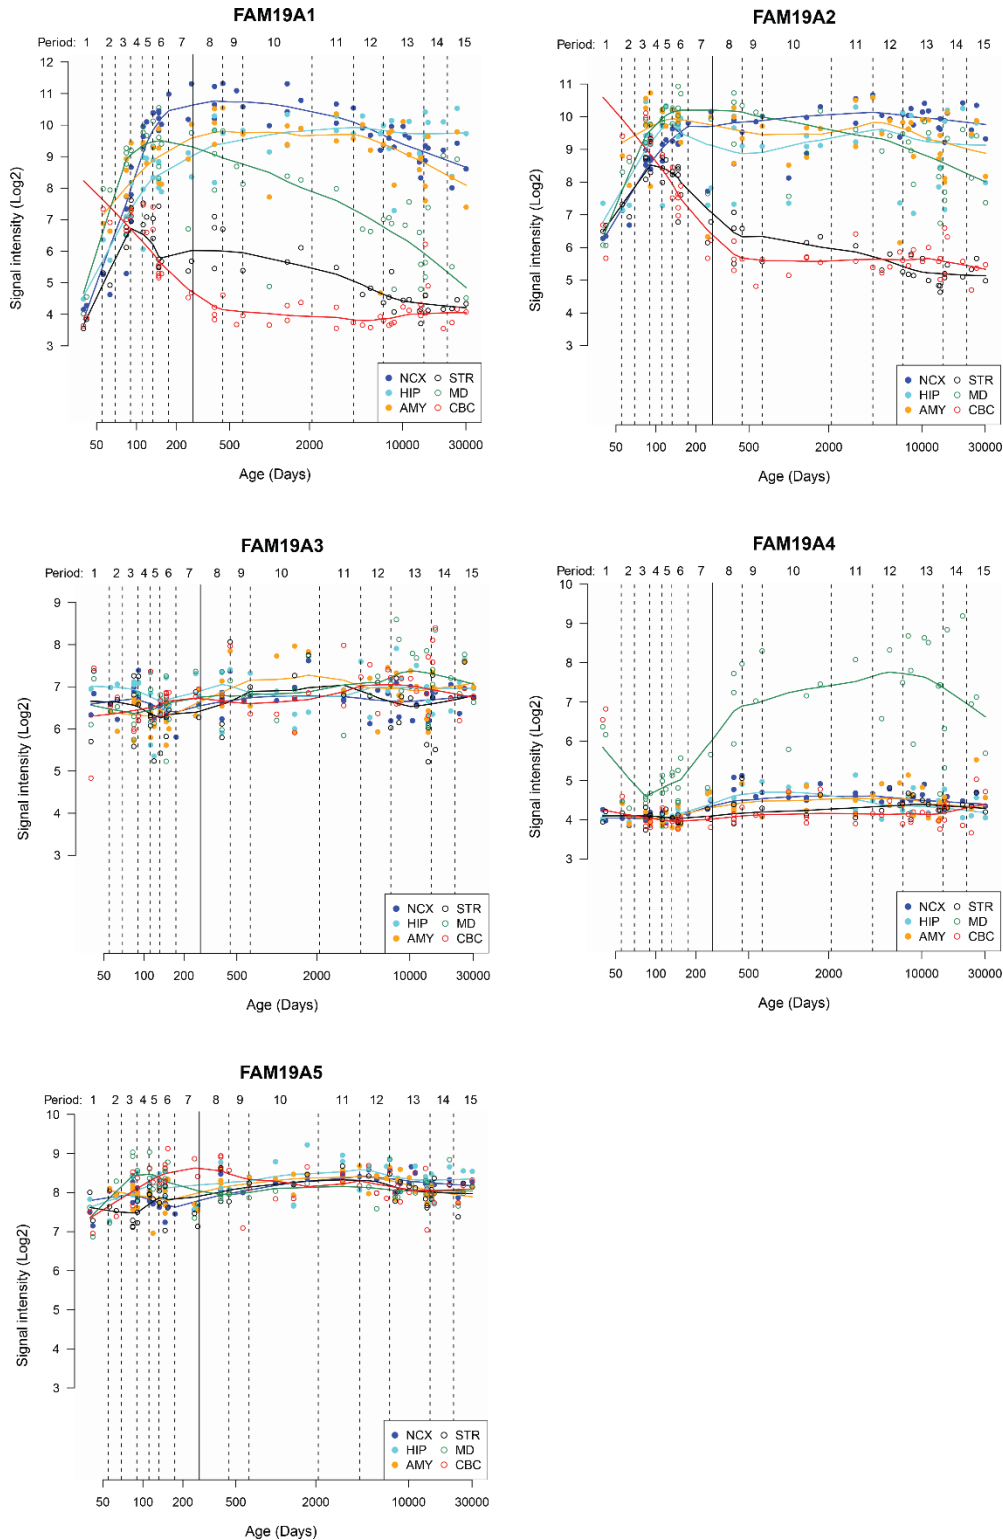

**Supplemental Figure S2.** Expression of rat *Fam19a1-a5* in primary rat cortical neurons and astrocytes. Data are expressed as mean  $\pm$  SEM. Two-tailed Student's t-tests are used for comparing gene expression levels in cortical neurons vs. astrocytes. \* $P < 0.05$ ; \*\*\* $P < 0.001$

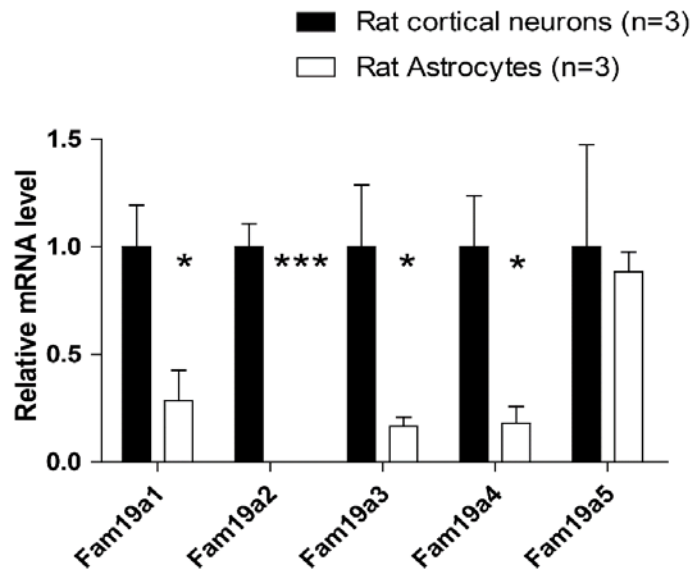

**Supplemental Figure S3. FAM19A1-A5 are secreted proteins with or without N-linked glycosylation.**

A, Western blot analysis of cell lysate/pellet (P) and supernatant (S) from HEK 293 cells transfected with C-terminal FLAG-tagged mouse Fam19a1-5 expression plasmids using anti-FLAG antibody; B, Western blot analysis of cell lysates of transfected HEK293 cells expressing either the C-terminal FLAG-tagged wild-type (WT) Fam19a5 or the N106A mutant.

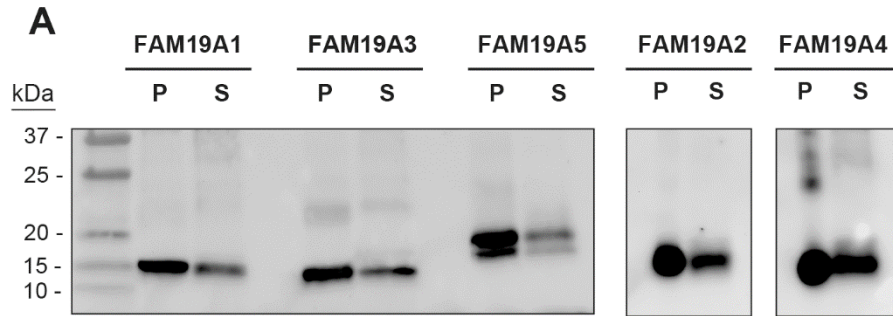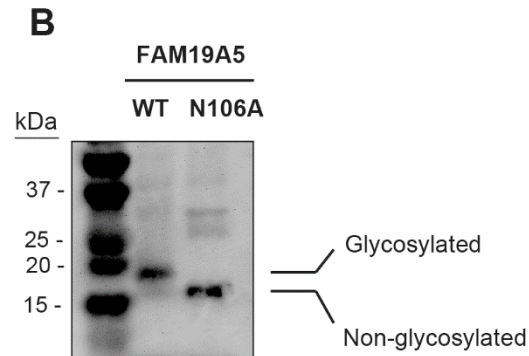

**Supplemental Figure S4.** Expression of *Fam19a2-a5* in the cortex and hippocampus of WT (n=5) and *Fam19a1* KO (n=5) female mice was measured by quantitative real-time PCR analysis. Expression levels were normalized to  $\beta$ -actin. Data are expressed as mean  $\pm$  SEM.

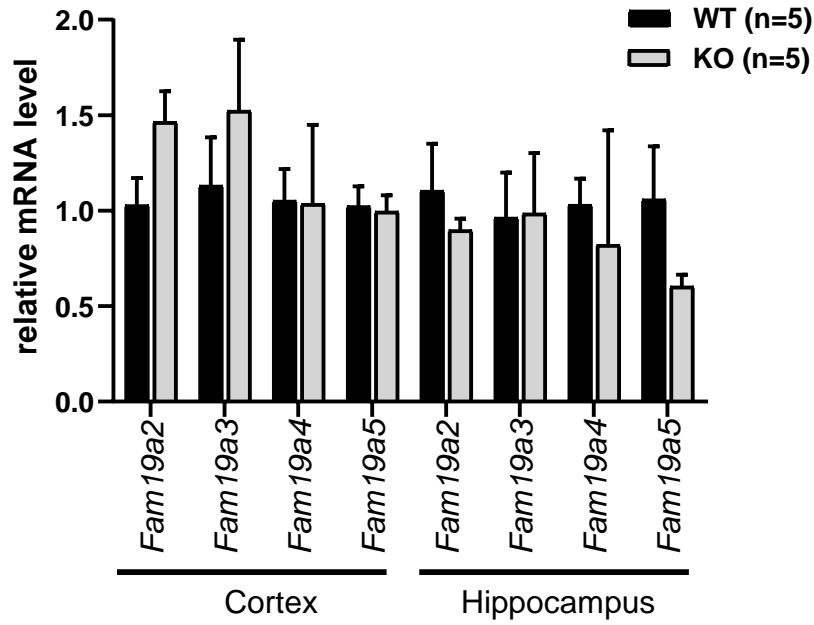

**Supplemental Figure S5.** Histamine-induced itch response in WT (n=6) and *Fam19a1* KO (n=6) female mice. For method details, please see Materials and Method section of the main text. Data are expressed as mean  $\pm$  SEM.

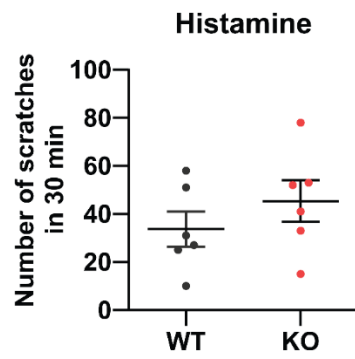

Supplement: fj.201901232RR.sd1.pdf [file fj.201901232RR.sd1.pdf]
